# Supplementary material for: Youth’s Social Environments: Associations with Mental Problems and Achievement of Developmental Milestones in Times of Crises
Source: MDPI journal article supplement (doi:10.3390/adolescents3020025), 2023-06-16
Supplement: s1 [file s1]

Archive with 1 entries (1 files):
- adolescents-2339132-supplementary.pdf
